# Supplementary material for: Reduced Graphene Oxide and Gold Nanoparticles-Modified Electrochemical Aptasensor for Highly Sensitive Detection of Doxorubicin
Source: MDPI journal article supplement (doi:10.3390/nano13071223), 2023-03-30
Supplement: s1 [file s1]

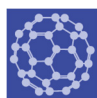

## Supplementary Materials

# Reduced Graphene Oxide and Gold Nanoparticles-Modified Electrochemical Aptasensor for Highly Sensitive Detection of Doxorubicin

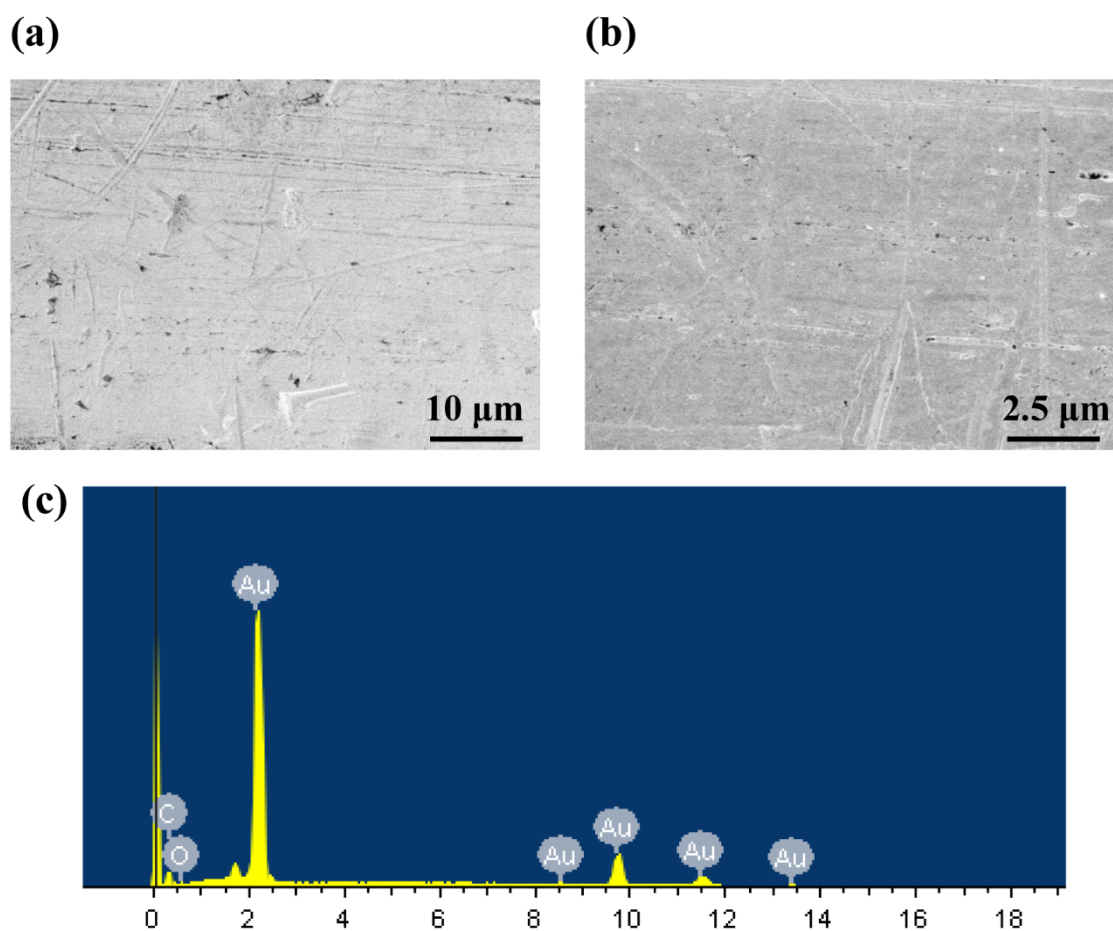

**Figure S1.** (a,b) Scanning electron microscope (SEM) images of bare electrode at different scales; (c) The energy dispersive X-Ray spectrometer (EDS) of the rGO/AuNPs modified electrode.
